# Supplementary material
Source: MDPI journal article supplement (https://www.mdpi.com/2072-4292/13/20/4028)
Supplement: s1 [file s1]

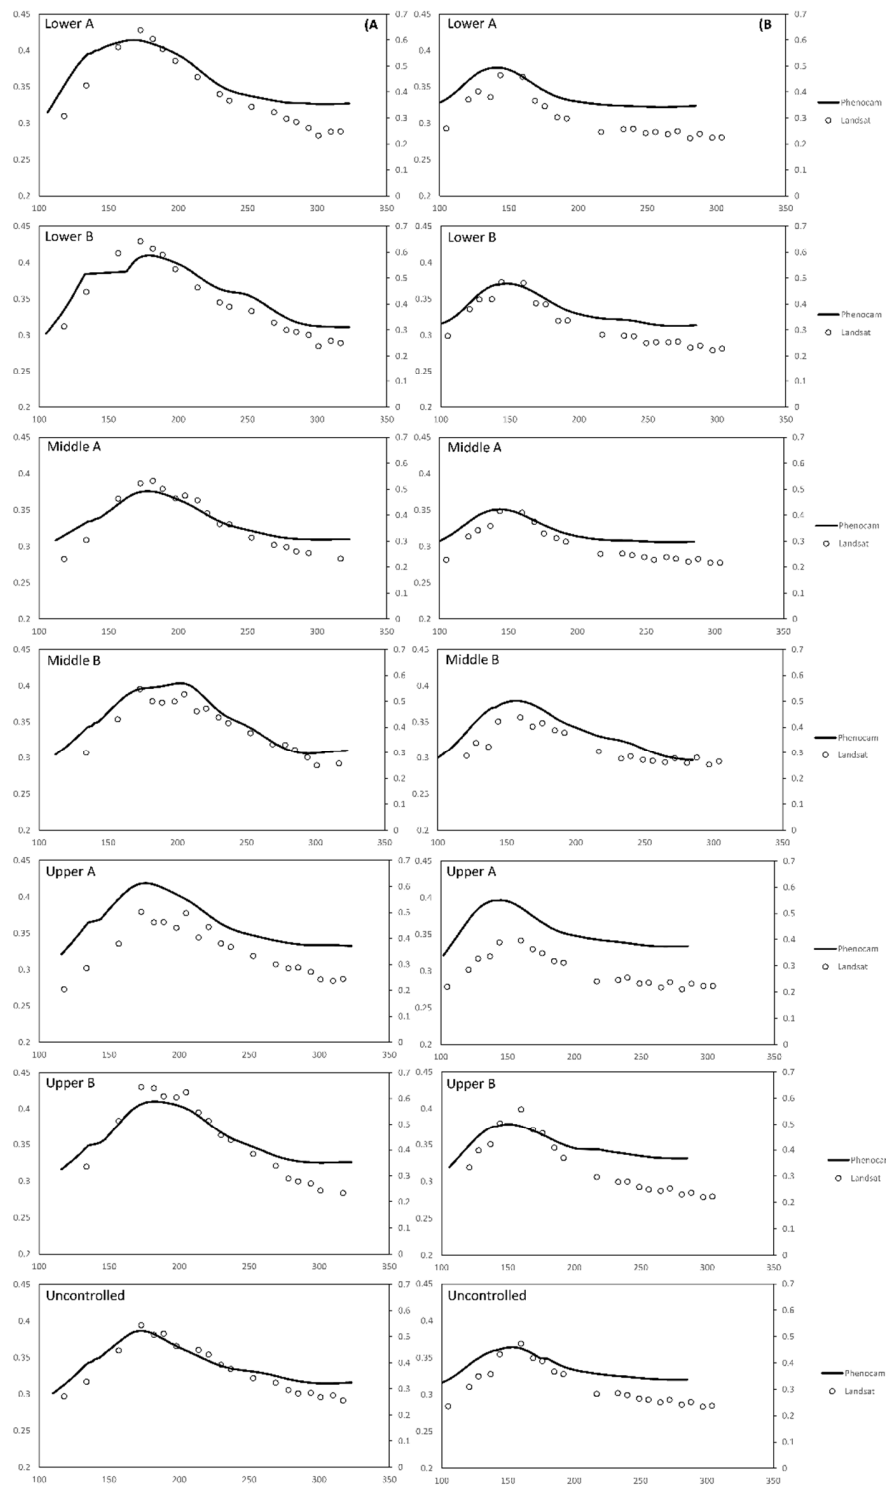

Figure S1. Phenocam derived Green Chromatic Coordinate values compared to Landsat derived Normalized Difference Vegetation Index values over a growing season for seven meadows in the Haypress Meadow complex of the Desatoya Mountains, Nevada, USA. Column A represents values taken from 2019, and column B represents values taken from 2020.
